# Supplementary material
Source: Springer Nature journal article supplement (https://www.springermedizin.de/resource/supplementary/13054_2010_8526_MOESM2_ESM.pdf/9732162)

**A****nNOS mRNA  
in lung tissue****(copies/ug total RNA  
normalized to GAPDH)**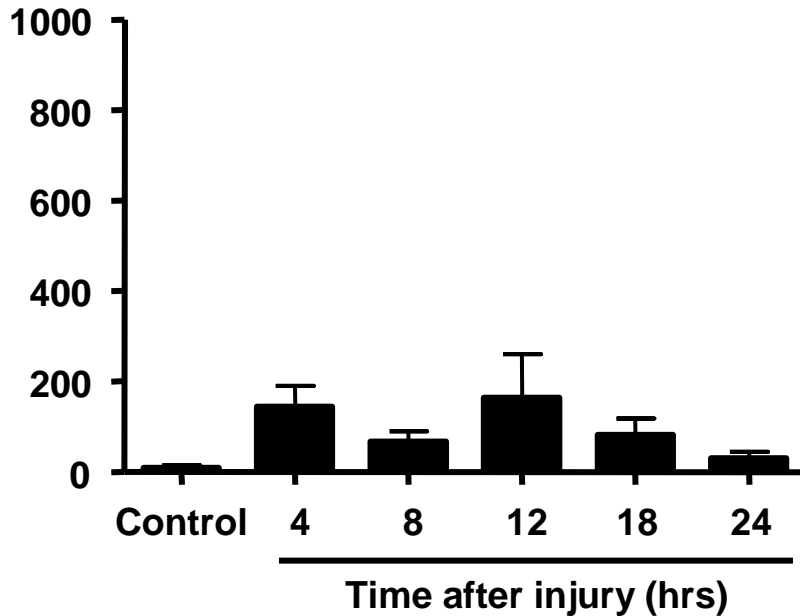**B****nNOS protein  
in lung tissue****(densitometrical units)**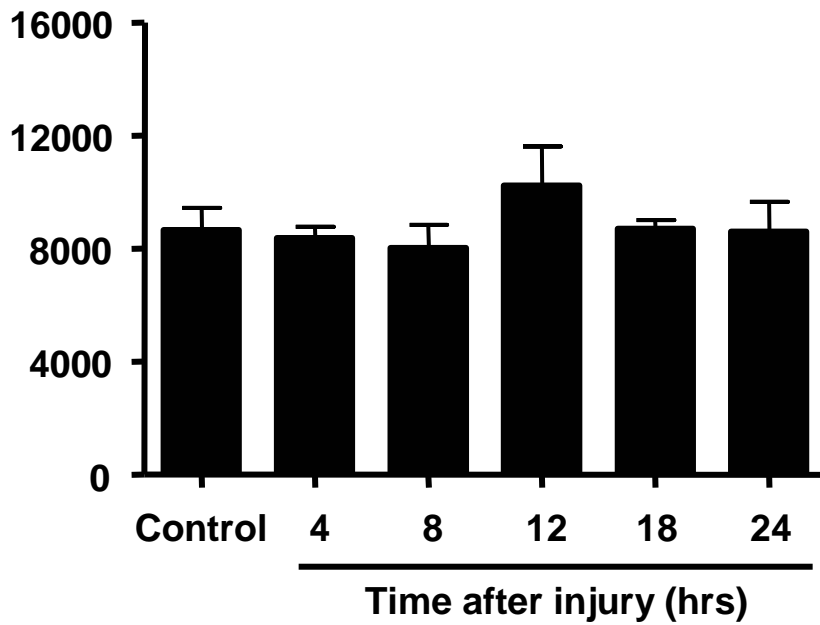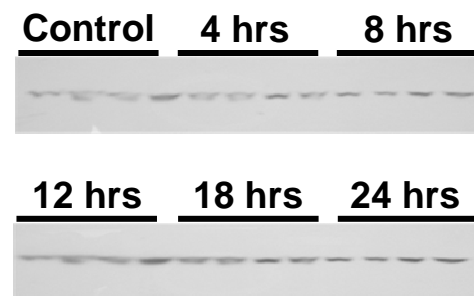

Supplement: MOESM2 [file 9732162]
